# Supplementary material for: Safety and Tolerability Results from the PILLAR Study: A Phase IV, Double-Blind, Randomized, Placebo-Controlled Study of Mirabegron in Patients ≥ 65 years with Overactive Bladder-Wet
Source: PubMed Central journal article supplement — Drugs Aging. 2020 Jul 28;37(9):665–76. doi: 10.1007/s40266-020-00783-w (PMC7473960; doi:10.1007/s40266-020-00783-w), 2020-07-28
Supplement: 40266_2020_783_MOESM1_ESM.pdf [file 40266_2020_783_MOESM1_ESM.pdf]

**Safety and Tolerability Results from the PILLAR Study: A Phase IV, Double-Blind, Randomized, Placebo-Controlled Study of Mirabegron in Patients ≥65 years with Overactive Bladder-Wet**

Sender Herschorn<sup>1</sup>, David Staskin<sup>2</sup>, Carol R. Schermer<sup>3</sup>, Rita M. Kristy<sup>3</sup>, Adrian Wagg<sup>4</sup>

<sup>1</sup> Department of Surgery/Urology, Sunnybrook Health Sciences Centre, University of Toronto, 2075 Bayview Avenue, MG408, Toronto, Ontario, M4N 3M5, Canada

<sup>2</sup> Division of Urology, St Elizabeth's Medical Center, 736 Cambridge Street, Brighton, Massachusetts 02135, USA

<sup>3</sup> Astellas Pharma Global Development, Inc., [1 Astellas Way](#), Northbrook, Illinois 60062, USA

<sup>4</sup> Department of Medicine, University of Alberta, 1-198 Clinical Sciences Building, 11350 83 Avenue, Edmonton, Alberta, Canada

Corresponding author: Sender Herschorn

Department of Surgery/Urology, Sunnybrook Health Sciences Centre, University of Toronto, 2075 Bayview Avenue, MG408, Toronto, Ontario, M4N 3M5, Canada

[s.herschorn@utoronto.ca](mailto:s.herschorn@utoronto.ca)

[Tel: 416-480-4787](tel:416-480-4787)

[Fax: 416-480-6121](tel:416-480-6121)

ORCID ID: <https://orcid.org/0000-0001-8666-8236>

**Supplementary Table 1 – Inclusion and exclusion criteria**

| <b>Inclusion criteria</b>                                                                                                                                                                                                                                                                                                                                                                                                                                                                                                                                                                                                                                                                                                                                                                                                                                                                                                                                                                                                                                                                                                                                                                                                                                                                                                                                                                                                                                                                                                                                                                                                                                                                                                                                                                                                                                                                                                                                                                                                                                                                                                                                                                                                                                 |
|-----------------------------------------------------------------------------------------------------------------------------------------------------------------------------------------------------------------------------------------------------------------------------------------------------------------------------------------------------------------------------------------------------------------------------------------------------------------------------------------------------------------------------------------------------------------------------------------------------------------------------------------------------------------------------------------------------------------------------------------------------------------------------------------------------------------------------------------------------------------------------------------------------------------------------------------------------------------------------------------------------------------------------------------------------------------------------------------------------------------------------------------------------------------------------------------------------------------------------------------------------------------------------------------------------------------------------------------------------------------------------------------------------------------------------------------------------------------------------------------------------------------------------------------------------------------------------------------------------------------------------------------------------------------------------------------------------------------------------------------------------------------------------------------------------------------------------------------------------------------------------------------------------------------------------------------------------------------------------------------------------------------------------------------------------------------------------------------------------------------------------------------------------------------------------------------------------------------------------------------------------------|
| <p>Assessed at Screening:</p> <ul style="list-style-type: none"><li>• IRB/IEC-approved written Informed Consent and privacy language as per national regulations obtained from patient/legally authorized representative prior to any study procedures</li><li>• Male/female aged <math>\geq 65</math> years</li><li>• Willing/able to complete micturition diary and questionnaires correctly</li><li>• Symptoms of OAB (urinary frequency and urgency with incontinence) for <math>\geq 3</math> months prior to screening</li><li>• Agreement not to participate in another interventional study between screening and final study visit</li></ul> <p>Assessed at baseline (after run-in period):</p> <ul style="list-style-type: none"><li>• Continued to meet above criteria</li><li>• <math>\geq 1</math> incontinence episode and <math>\geq 3</math> urgency episodes (PPIUS grade 3 or 4) based on the 3-day micturition diary</li><li>• <math>\geq 8</math> micturitions/day on average based on the 3-day micturition diary</li></ul>                                                                                                                                                                                                                                                                                                                                                                                                                                                                                                                                                                                                                                                                                                                                                                                                                                                                                                                                                                                                                                                                                                                                                                                                          |
| <b>Exclusion criteria</b>                                                                                                                                                                                                                                                                                                                                                                                                                                                                                                                                                                                                                                                                                                                                                                                                                                                                                                                                                                                                                                                                                                                                                                                                                                                                                                                                                                                                                                                                                                                                                                                                                                                                                                                                                                                                                                                                                                                                                                                                                                                                                                                                                                                                                                 |
| <p>Assessed at Screening:</p> <ul style="list-style-type: none"><li>• Ongoing symptoms suggestive of BOO or history of poorly controlled BOO</li><li>• Post-void residual volume <math>&gt;150</math> mL</li><li>• Neurogenic bladder or neurological dysfunction/injury that could affect the lower urinary tract or nerve supply</li><li>• Significant stress incontinence or mixed stress/urgency incontinence with stress the predominant factor as determined by the investigator (confirmed by cough provocation test for female subjects). Patients with a history of stress incontinence under treatment could be included if cough provocation test passed</li><li>• Indwelling catheter or practiced intermittent self-catheterization</li><li>• Evidence of UTI. If a patient had a UTI at screening, rescreening could occur after confirmed successful treatment</li><li>• Chronic inflammatory condition such as interstitial cystitis, bladder stones, previous pelvic radiation therapy, or previous/current malignant disease of the pelvic organs.</li><li>• Residence in a nursing home</li><li>• Likely to enter hospital or nursing home within the next 6 months due to medical instability, in the opinion of the investigator</li><li>• Received intravesical injection in the past 12 months with botulinum toxin, resiniferatoxin, or capsaicin</li><li>• Received electro-stimulation therapy for OAB</li><li>• Began/changed a bladder training program or pelvic floor exercises <math>&lt;30</math> days prior to screening</li><li>• Moderate or severe hepatic impairment (Child-Pugh Class B or C)</li><li>• Severe renal impairment (estimated creatinine clearance <math>&lt;29</math> mL/min determined by eGFR; Cockcroft-Gault or MDRD formulae). Patients with ESRD or undergoing dialysis were not candidates for the study</li><li>• Severe uncontrolled hypertension (sitting SBP <math>\geq 180</math> mmHg and/or DBP <math>\geq 110</math> mmHg)</li><li>• Evidence of QT prolongation on ECG (QTc <math>&gt;450</math> ms for men or <math>&gt;470</math> ms for women) or a known history of QT prolongation</li><li>• Clinically significant ECG abnormality, as determined by the investigator</li></ul> |

- AST or ALT > 2x ULN or  $\gamma$ -GT >3x ULN and considered clinically significant by the investigator
- Hypersensitivity to any component of mirabegron, other  $\beta$  adrenoreceptor agonists, or any of the inactive ingredients
- Any clinically significant condition, which in the opinion of the investigator, makes the patient unsuitable for study participation
- Treated with an experimental device with 28 days or received an investigational agent within 28 days or 5 half-lives (whichever is longer) prior to screening
- Concurrent malignancy or history of any malignancy within the past 5 years, except non-metastatic basal or squamous cell carcinoma of the skin that was treated successfully
- Current history of alcohol/drug abuse
- Use of protocol-prohibited medications which could not be stopped safely within 30 days prior to screening
- Stopped, started, or changed the dose of a protocol-restricted medication within 30 days prior to screening
- An employee of Astellas, third party associated with the study, or study site team
- Previously received mirabegron

Assessed at baseline (after run-in period):

- Any exclusion criteria above (screening assessments not repeated)
- Non-compliance during placebo run-in period, defined as taking <80% or >120% of study medication

Any SBP measurement  $\geq$ 180 mmHg or DBP measurement  $\geq$ 110 mmHg in the 3-day diary or during the baseline visit

*AST* aspartate aminotransferase, *ALT* alanine aminotransferase, *BOO* bladder outlet obstruction, *DBP* diastolic blood pressure, *eGFR* estimated glomerular filtration rate, *ECG* electrocardiogram,  *$\gamma$ -GT* gamma-glutamyl transferase, *IEC* Independent Ethics Committee, *IRB* institutional review board, *MDRD* Modification of Diet in Renal Disease, *OAB* overactive bladder syndrome, *PPIUS* Patient Perception of Intensity of Urgency Scale, *SBP* systolic blood pressure, *ULN* upper limit of normal, *UTI* urinary tract infection.
